# Supplementary material for: A Meta-Analysis Showing the Quantitative Evidence Base of Preemptive Pregabalin for Postoperative Pain from Cancer-Related Surgery
Source: MDPI journal article supplement (doi:10.3390/medicina59020280), 2023-01-31
Supplement: s1 [file s1]

## Supplementary Online Content

| <b>Table of Contents</b>                                               | <b>Page</b>  |
|------------------------------------------------------------------------|--------------|
| <b>Methods S1:</b> PubMed Search Strategy Search strategy              | <b>2-5</b>   |
| <b>Methods S2:</b> Web of Science Search Strategy Search strategy      | <b>6</b>     |
| <b>Methods S3:</b> EMBASE Search Strategy Search strategy              | <b>6</b>     |
| <b>Methods S4:</b> Cochrane Library Search Strategy Search strategy    | <b>7</b>     |
| <b>Methods S5:</b> Google Scholar Search Strategy Search strategy      | <b>8</b>     |
| <b>Table S1:</b> Risk of Bias Assessment                               | <b>9-16</b>  |
| <b>Table S2:</b> GRADE quality of evidence summary table               | <b>17-29</b> |
| <b>Table S3:</b> Meta-regression analysis for primary outcomes         | <b>30</b>    |
| <b>Table S4A:</b> Subgroup analyses for primary and safety outcomes    | <b>31-33</b> |
| <b>Table S4B:</b> Predefined sensitivity analyses for primary outcomes | <b>34</b>    |
| <b>Figure S1:</b> Risk of bias summary                                 | <b>35</b>    |

**Methods S1: PubMed Search Strategy** Search strategy

**PubMed (48)**

| Subject words:                                    | Free words                                                                                                                                                                                                                                                                            |
|---------------------------------------------------|---------------------------------------------------------------------------------------------------------------------------------------------------------------------------------------------------------------------------------------------------------------------------------------|
| Pregabalin                                        | (S)-3-(aminomethyl)-5-methylhexanoic acid<br>3-isobutyl GABA<br>3 isobutyl GABA<br>GABA, 3-isobutyl<br>3-(aminomethyl)-5-methylhexanoic acid<br>(R-)-3-isobutyl GABA<br>(S+)-3-isobutyl GABA<br>Lyrica<br>CI 1008<br>1008, CI<br>CI-1008<br>CI1008<br>gamma-Aminobutyric Acid<br>GABA |
| Neoplasms                                         | Tumor<br>Neoplasm<br>Tumors<br>Neoplasia<br>Neoplasias<br>Cancer<br>Cancers<br>Malignant Neoplasm<br>Malignancy<br>Malignancies<br>Malignant Neoplasms<br>Neoplasm, Malignant<br>Neoplasms, Malignant<br>Benign Neoplasms<br>Benign Neoplasm<br>Neoplasms, Benign<br>Neoplasm, Benign |
| General Surgery<br>Surgical Procedures, Operative | operative therapy<br>invasive procedures<br>operative procedures                                                                                                                                                                                                                      |

|  |                                                                                                                                                          |
|--|----------------------------------------------------------------------------------------------------------------------------------------------------------|
|  | operations<br>perioperative procedures<br>intraoperative procedures<br>peroperative procedures<br>preoperative procedures<br>Surgery<br>Surgery, General |
|--|----------------------------------------------------------------------------------------------------------------------------------------------------------|

**1.** (((((((((((((((Pregabalin[MeSH Terms]) OR (Pregabalin[Title/Abstract])) OR ((S)-3-(aminomethyl)-5-methylhexanoic acid[Title/Abstract])) OR (3-isobutyl GABA[Title/Abstract])) OR (3 isobutyl GABA[Title/Abstract])) OR (GABA, 3-isobutyl[Title/Abstract])) OR (3-(aminomethyl)-5-methylhexanoic acid[Title/Abstract])) OR ((R)-3-isobutyl GABA[Title/Abstract])) OR ((S+)-3-isobutyl GABA[Title/Abstract])) OR (Lyrica[Title/Abstract])) OR (CI 1008[Title/Abstract])) OR (1008, CI[Title/Abstract])) OR (CI-1008[Title/Abstract])) OR (CI1008[Title/Abstract])) OR (gamma-Aminobutyric Acid[Title/Abstract])) OR (GABA[Title/Abstract])) **[70,776]**

**2.** (((((((((((((((((((Neoplasms[MeSH Terms])) OR (Neoplasms[Title/Abstract])) OR (Tumor[Title/Abstract])) OR (Neoplasm[Title/Abstract])) OR (Tumors[Title/Abstract])) OR (Neoplasia[Title/Abstract])) OR (Neoplasias[Title/Abstract])) OR (Cancer[Title/Abstract])) OR (Cancers[Title/Abstract])) OR (Malignant Neoplasm[Title/Abstract])) OR (Malignancy[Title/Abstract])) OR (Malignancies[Title/Abstract])) OR (Malignant Neoplasms[Title/Abstract])) OR (Neoplasm, Malignant[Title/Abstract])) OR (Neoplasms, Malignant[Title/Abstract])) OR (Benign Neoplasms[Title/Abstract])) OR (Benign Neoplasm[Title/Abstract])) OR (Neoplasms, Benign[Title/Abstract])) OR (Neoplasm, Benign[Title/Abstract])) OR (cancer)) OR (tumor) **[5,202,337]**

**3.** ((Surgical Procedures, Operative[MeSH Terms]) OR (((((((((((General Surgery[MeSH Terms]) OR (Surgery[MeSH Subheading])) OR (General Surgery[Title/Abstract])) OR (Surgery[Title/Abstract])) OR (operative therapy[Title/Abstract])) OR (invasive procedures[Title/Abstract])) OR (operative procedures[Title/Abstract])) OR (operations[Title/Abstract])) OR (perioperative procedures[Title/Abstract])) OR (intraoperative procedures[Title/Abstract])) OR (peroperative procedures[Title/Abstract])) OR (preoperative procedures[Title/Abstract])) OR (Surgery, General[Title/Abstract])) OR (Preoperative[Title/Abstract]) **[4,658,132]**

**4.** random **[1,365,784]**

**5.** (((((((((((((((Pregabalin[MeSH Terms]) OR (Pregabalin[Title/Abstract])) OR ((S)-3-(aminomethyl)-5-methylhexanoic acid[Title/Abstract])) OR (3-isobutyl

GABA[Title/Abstract])) OR (3 isobutyl GABA[Title/Abstract])) OR (GABA, 3-isobutyl[Title/Abstract])) OR (3-(aminomethyl)-5-methylhexanoic acid[Title/Abstract])) OR ((R)-3-isobutyl GABA[Title/Abstract])) OR ((S+)-3-isobutyl GABA[Title/Abstract])) OR (Lyrica[Title/Abstract])) OR (CI 1008[Title/Abstract])) OR (1008, CI[Title/Abstract])) OR (CI-1008[Title/Abstract])) OR (CI1008[Title/Abstract])) OR (gamma-Aminobutyric Acid[Title/Abstract])) OR (GABA[Title/Abstract])) AND (((((((((((((((((((Neoplasms[MeSH Terms])) OR (Neoplasms[Title/Abstract])) OR (Tumor[Title/Abstract])) OR (Neoplasm[Title/Abstract])) OR (Tumors[Title/Abstract])) OR (Neoplasia[Title/Abstract])) OR (Neoplasias[Title/Abstract])) OR (Cancer[Title/Abstract])) OR (Cancers[Title/Abstract])) OR (Malignant Neoplasm[Title/Abstract])) OR (Malignancy[Title/Abstract])) OR (Malignancies[Title/Abstract])) OR (Malignant Neoplasms[Title/Abstract])) OR (Neoplasm, Malignant[Title/Abstract])) OR (Neoplasms, Malignant[Title/Abstract])) OR (Benign Neoplasms[Title/Abstract])) OR (Benign Neoplasm[Title/Abstract])) OR (Neoplasms, Benign[Title/Abstract])) OR (Neoplasm, Benign[Title/Abstract])) OR (cancer)) OR (tumor))) AND (((Surgical Procedures, Operative[MeSH Terms])) OR (((((((((((General Surgery[MeSH Terms])) OR (Surgery[MeSH Subheading])) OR (General Surgery[Title/Abstract])) OR (Surgery[Title/Abstract])) OR (operative therapy[Title/Abstract])) OR (invasive procedures[Title/Abstract])) OR (operative procedures[Title/Abstract])) OR (operations[Title/Abstract])) OR (perioperative procedures[Title/Abstract])) OR (intraoperative procedures[Title/Abstract])) OR (peroperative procedures[Title/Abstract])) OR (preoperative procedures[Title/Abstract])) OR (Surgery, General[Title/Abstract])) OR (Preoperative[Title/Abstract]))) AND (random) [48]

| Search | Actions | Details | Query                                                                                                                                                                                                                                                                                                                                                                                                                                                                                                                                                                                                                                                                                                                                                                                                                                                                                                                                                                                                                                                                                                                                                                                                                                                                                                                                                                                                                                                                                                                                                                                                                                                                                                                                                                                                                                                                                                                                                                                                                                                    | Results   | Time     |
|--------|---------|---------|----------------------------------------------------------------------------------------------------------------------------------------------------------------------------------------------------------------------------------------------------------------------------------------------------------------------------------------------------------------------------------------------------------------------------------------------------------------------------------------------------------------------------------------------------------------------------------------------------------------------------------------------------------------------------------------------------------------------------------------------------------------------------------------------------------------------------------------------------------------------------------------------------------------------------------------------------------------------------------------------------------------------------------------------------------------------------------------------------------------------------------------------------------------------------------------------------------------------------------------------------------------------------------------------------------------------------------------------------------------------------------------------------------------------------------------------------------------------------------------------------------------------------------------------------------------------------------------------------------------------------------------------------------------------------------------------------------------------------------------------------------------------------------------------------------------------------------------------------------------------------------------------------------------------------------------------------------------------------------------------------------------------------------------------------------|-----------|----------|
| #5     | ...     | >       | Search: (((((((((((((((Pregabalin[MeSH Terms]) OR (Pregabalin[Title/Abstract])) OR ((S)-3-(aminomethyl)-5-methylhexanoic acid[Title/Abstract])) OR (3-isobutyl GABA[Title/Abstract])) OR (3 isobutyl GABA[Title/Abstract])) OR (GABA, 3-isobutyl[Title/Abstract])) OR (3-(aminomethyl)-5-methylhexanoic acid[Title/Abstract])) OR ((R)-3-isobutyl GABA[Title/Abstract])) OR ((S+)-3-isobutyl GABA[Title/Abstract])) OR (Lyrica[Title/Abstract])) OR (CI 1008[Title/Abstract])) OR (1008, CI[Title/Abstract])) OR (CI-1008[Title/Abstract])) OR (CI1008[Title/Abstract])) OR (gamma-Aminobutyric Acid[Title/Abstract])) OR (GABA[Title/Abstract])) AND (((((((((((((((Neoplasms[MeSH Terms]) OR (Neoplasms[Title/Abstract])) OR (Tumor[Title/Abstract])) OR (Neoplasm[Title/Abstract])) OR (Tumors[Title/Abstract])) OR (Neoplasia[Title/Abstract])) OR (Neoplasias[Title/Abstract])) OR (Cancer[Title/Abstract])) OR (Cancers[Title/Abstract])) OR (Malignant Neoplasm[Title/Abstract])) OR (Malignancy[Title/Abstract])) OR (Malignancies[Title/Abstract])) OR (Malignant Neoplasms[Title/Abstract])) OR (Neoplasm, Malignant[Title/Abstract])) OR (Neoplasms, Malignant[Title/Abstract])) OR (Benign Neoplasms[Title/Abstract])) OR (Benign Neoplasm[Title/Abstract])) OR (Neoplasms, Benign[Title/Abstract])) OR (Neoplasm, Benign[Title/Abstract])) OR (cancer) OR (tumor))) AND (((Surgical Procedures, Operative[MeSH Terms]) OR (((((((((((General Surgery[MeSH Terms]) OR (Surgery[MeSH Subheading])) OR (General Surgery[Title/Abstract])) OR (Surgery[Title/Abstract])) OR (operative therapy[Title/Abstract])) OR (invasive procedures[Title/Abstract])) OR (operative procedures[Title/Abstract])) OR (operations[Title/Abstract])) OR (perioperative procedures[Title/Abstract])) OR (intraoperative procedures[Title/Abstract])) OR (peroperative procedures[Title/Abstract])) OR (preoperative procedures[Title/Abstract])) OR (Surgery, General[Title/Abstract])) OR (Preoperative[Title/Abstract])))) AND (random) Sort by: Most Recent | 48        | 21:46:35 |
| #4     | ...     | >       | Search: random Sort by: Most Recent                                                                                                                                                                                                                                                                                                                                                                                                                                                                                                                                                                                                                                                                                                                                                                                                                                                                                                                                                                                                                                                                                                                                                                                                                                                                                                                                                                                                                                                                                                                                                                                                                                                                                                                                                                                                                                                                                                                                                                                                                      | 1,365,784 | 20:50:31 |
| #3     | ...     | >       | Search: ((Surgical Procedures, Operative[MeSH Terms]) OR (((((((((((General Surgery[MeSH Terms]) OR (Surgery[MeSH Subheading])) OR (General Surgery[Title/Abstract])) OR (Surgery[Title/Abstract])) OR (operative therapy[Title/Abstract])) OR (invasive procedures[Title/Abstract])) OR (operative procedures[Title/Abstract])) OR (operations[Title/Abstract])) OR (perioperative procedures[Title/Abstract])) OR (intraoperative procedures[Title/Abstract])) OR (peroperative procedures[Title/Abstract])) OR (preoperative procedures[Title/Abstract])) OR (Surgery, General[Title/Abstract])) OR (Preoperative[Title/Abstract])) Sort by: Most Recent                                                                                                                                                                                                                                                                                                                                                                                                                                                                                                                                                                                                                                                                                                                                                                                                                                                                                                                                                                                                                                                                                                                                                                                                                                                                                                                                                                                              | 4,658,132 | 20:50:15 |
| #2     | ...     | >       | Search: (((((((((((((((Neoplasms[MeSH Terms]) OR (Neoplasms[Title/Abstract])) OR (Tumor[Title/Abstract])) OR (Neoplasm[Title/Abstract])) OR (Tumors[Title/Abstract])) OR (Neoplasia[Title/Abstract])) OR (Neoplasias[Title/Abstract])) OR (Cancer[Title/Abstract])) OR (Cancers[Title/Abstract])) OR (Malignant Neoplasm[Title/Abstract])) OR (Malignancy[Title/Abstract])) OR (Malignancies[Title/Abstract])) OR (Malignant Neoplasms[Title/Abstract])) OR (Neoplasm, Malignant[Title/Abstract])) OR (Neoplasms, Malignant[Title/Abstract])) OR (Benign Neoplasms[Title/Abstract])) OR (Benign Neoplasm[Title/Abstract])) OR (Neoplasms, Benign[Title/Abstract])) OR (Neoplasm, Benign[Title/Abstract])) OR (cancer) OR (tumor) Sort by: Most Recent                                                                                                                                                                                                                                                                                                                                                                                                                                                                                                                                                                                                                                                                                                                                                                                                                                                                                                                                                                                                                                                                                                                                                                                                                                                                                                    | 5,202,337 | 20:50:00 |
| #1     | ...     | >       | Search: (((((((((((((((Pregabalin[MeSH Terms]) OR (Pregabalin[Title/Abstract])) OR ((S)-3-(aminomethyl)-5-methylhexanoic acid[Title/Abstract])) OR (3-isobutyl GABA[Title/Abstract])) OR (3 isobutyl GABA[Title/Abstract])) OR (GABA, 3-isobutyl[Title/Abstract])) OR (3-(aminomethyl)-5-methylhexanoic acid[Title/Abstract])) OR ((R)-3-isobutyl GABA[Title/Abstract])) OR ((S+)-3-isobutyl GABA[Title/Abstract])) OR (Lyrica[Title/Abstract])) OR (CI 1008[Title/Abstract])) OR (1008, CI[Title/Abstract])) OR (CI-1008[Title/Abstract])) OR (CI1008[Title/Abstract])) OR (gamma-Aminobutyric Acid[Title/Abstract])) OR (GABA[Title/Abstract])) Sort by: Most Recent                                                                                                                                                                                                                                                                                                                                                                                                                                                                                                                                                                                                                                                                                                                                                                                                                                                                                                                                                                                                                                                                                                                                                                                                                                                                                                                                                                                   | 70,776    | 20:48:59 |

## Web of Science (251)

#1: (((((((((((((TS=(Pregabalin)) OR TS=((S)-3-(aminomethyl)-5-methylhexanoic acid)) OR TS=(3-isobutyl GABA)) OR TS=(3 isobutyl GABA)) OR TS=(GABA, 3-isobutyl)) OR TS=(3-(aminomethyl)-5-methylhexanoic acid)) OR TS=((R)-3-isobutyl GABA)) OR TS=((S+)-3-isobutyl GABA)) OR TS=(Lyrica)) OR TS=(CI 1008)) OR TS=(1008, CI)) OR TS=(CI-1008)) OR TS=(CI1008))) [23,678]

#2: (((((((((((((((((TS=(Neoplasms)) OR TS=(Tumor)) OR TS=(Neoplasm)) OR TS=(Tumors)) OR TS=(Neoplasia)) OR TS=(Neoplasias)) OR TS=(Cancer)) OR TS=(Cancers)) OR TS=(Malignant Neoplasm)) OR TS=(Malignancy)) OR TS=(Malignancies)) OR TS=(Malignant Neoplasms)) OR TS=(Neoplasm, Malignant)) OR TS=(Neoplasms, Malignant)) OR TS=(Benign Neoplasms)) OR TS=(Benign Neoplasm)) OR TS=(Neoplasms, Benign)) OR TS=(Neoplasm, Benign) [8,645,674]

#3: (((((((((((((TS=(General Surgery)) OR TS=(operative therapy)) OR TS=(invasive procedures)) OR TS=(operative procedures)) OR TS=(operations)) OR TS=(perioperative procedures)) OR TS=(intraoperative procedures)) OR TS=(peroperative procedures)) OR TS=(preoperative procedures)) OR TS=(Surgery)) OR TS=(Surgery, General) [13,056,182]

#4: #3 AND #2 AND #1 [190]

|                            |                                                                                                                                                                                                                                                                                                                                                                                                                  |            |                              |                      |                      |                       |
|----------------------------|------------------------------------------------------------------------------------------------------------------------------------------------------------------------------------------------------------------------------------------------------------------------------------------------------------------------------------------------------------------------------------------------------------------|------------|------------------------------|----------------------|----------------------|-----------------------|
| <input type="checkbox"/> 4 | #3 AND #2 AND #1                                                                                                                                                                                                                                                                                                                                                                                                 | 190        | <a href="#">Add to query</a> | <a href="#">Link</a> | <a href="#">Edit</a> | <a href="#">Alert</a> |
| <input type="checkbox"/> 3 | (((TS=(General Surgery)) OR TS=(operative therapy)) OR TS=(invasive procedures)) OR TS=(operative procedures)) OR TS=(operations)) OR TS=(perioperative procedures)) OR TS=(intraoperative procedures)) OR TS=(peroperative procedures)) OR TS=(preoperative procedures)) OR TS=(Surgery)) OR TS=(Surgery, General)                                                                                              | 13,056,182 | <a href="#">Add to query</a> | <a href="#">Link</a> | <a href="#">Edit</a> | <a href="#">Alert</a> |
| <input type="checkbox"/> 2 | (((TS=(Neoplasms)) OR TS=(Tumor)) OR TS=(Neoplasm)) OR TS=(Tumors)) OR TS=(Neoplasia)) OR TS=(Neoplasias)) OR TS=(Cancer)) OR TS=(Cancers)) OR TS=(Malignant Neoplasm)) OR TS=(Malignancy)) OR TS=(Malignancies)) OR TS=(Malignant Neoplasms)) OR TS=(Neoplasm, Malignant)) OR TS=(Neoplasms, Malignant)) OR TS=(Benign Neoplasms)) OR TS=(Benign Neoplasm)) OR TS=(Neoplasms, Benign)) OR TS=(Neoplasm, Benign) | 8,645,674  | <a href="#">Add to query</a> | <a href="#">Link</a> | <a href="#">Edit</a> | <a href="#">Alert</a> |
| <input type="checkbox"/> 1 | (((TS=(Pregabalin)) OR TS=((S)-3-(aminomethyl)-5-methylhexanoic acid)) OR TS=(3-isobutyl GABA)) OR TS=(3 isobutyl GABA)) OR TS=(GABA, 3-isobutyl)) OR TS=(3-(aminomethyl)-5-methylhexanoic acid)) OR TS=((R)-3-isobutyl GABA)) OR TS=((S+)-3-isobutyl GABA)) OR TS=(Lyrica)) OR TS=(CI 1008)) OR TS=(1008, CI)) OR TS=(CI-1008)) OR TS=(CI1008))                                                                 | 23,678     | <a href="#">Add to query</a> | <a href="#">Link</a> | <a href="#">Edit</a> | <a href="#">Alert</a> |

## Embase (1231)

|                                  |                                                                                                                                                                                                                                                                                                                                                                                                                                                 |           |                                                                     |                          |
|----------------------------------|-------------------------------------------------------------------------------------------------------------------------------------------------------------------------------------------------------------------------------------------------------------------------------------------------------------------------------------------------------------------------------------------------------------------------------------------------|-----------|---------------------------------------------------------------------|--------------------------|
| <input type="checkbox"/> History | Save   Delete   Print view   Export   Email                                                                                                                                                                                                                                                                                                                                                                                                     | Combine > | using <input checked="" type="radio"/> And <input type="radio"/> Or | <a href="#">Collapse</a> |
| <input type="checkbox"/> #4      | #1 AND #2 AND #3                                                                                                                                                                                                                                                                                                                                                                                                                                |           |                                                                     | 1,231                    |
| <input type="checkbox"/> #3      | 'general surgery'/exp OR 'general surgery':ab,ti OR 'operative therapy':ab,ti OR 'invasive procedures':ab,ti OR 'operative procedures':ab,ti OR 'operations':ab,ti OR 'perioperative procedures':ab,ti OR 'intraoperative procedures':ab,ti OR 'peroperative procedures':ab,ti OR 'preoperative procedures':ab,ti OR 'surgery':ab,ti OR 'surgery, general':ab,ti OR 'surgical procedures, operative':ab,ti OR 'surgery'/exp                     |           |                                                                     | 6,103,707                |
| <input type="checkbox"/> #2      | 'neoplasm'/exp OR 'tumor':ab,ti OR 'neoplasm':ab,ti OR 'tumors':ab,ti OR 'neoplasia':ab,ti OR 'neoplasias':ab,ti OR 'cancer':ab,ti OR 'cancers':ab,ti OR 'malignant neoplasm':ab,ti OR 'malignancy':ab,ti OR 'malignancies':ab,ti OR 'malignant neoplasms':ab,ti OR 'neoplasm, malignant':ab,ti OR 'neoplasms, malignant':ab,ti OR 'benign neoplasms':ab,ti OR 'benign neoplasm':ab,ti OR 'neoplasms, benign':ab,ti OR 'neoplasm, benign':ab,ti |           |                                                                     | 6,422,779                |
| <input type="checkbox"/> #1      | 'pregabalin'/exp OR 'pregabalin':ab,ti OR '(s)-3-(aminomethyl)-5-methylhexanoic acid':ab,ti OR '3-isobutyl gaba':ab,ti OR '3 isobutyl gaba':ab,ti OR 'gaba, 3-isobutyl':ab,ti OR '3-(aminomethyl)-5-methylhexanoic acid':ab,ti OR '(r)-3-isobutyl gaba':ab,ti OR '(s+)-3-isobutyl gaba':ab,ti OR 'lyrica':ab,ti OR 'ci 1008':ab,ti OR '1008, ci':ab,ti OR 'ci-1008':ab,ti OR 'ci1008':ab,ti OR 'gamma-aminobutyric acid':ab,ti OR 'gaba':ab,ti  |           |                                                                     | 93,405                   |

## Cochrane Library (46)

|                          |                          |                          |     |                                                                                                                                                                               |        |               |
|--------------------------|--------------------------|--------------------------|-----|-------------------------------------------------------------------------------------------------------------------------------------------------------------------------------|--------|---------------|
| <input type="checkbox"/> | <input type="checkbox"/> | <input type="checkbox"/> | #1  | MeSH descriptor: [Pregabalin] explode all trees                                                                                                                               | MeSH ▼ | 888           |
| <input type="checkbox"/> | <input type="checkbox"/> | <input type="checkbox"/> | #2  | (Pregabalin):ti,ab,kw OR (3 isobutyl GABA):ti,ab,kw OR (Lyrica):ti,ab,kw OR (CI 1008):ti,ab,kw OR (1008, CI):ti,ab,kw                                                         | S ▼    | Limits 2456   |
| <input type="checkbox"/> | <input type="checkbox"/> | <input type="checkbox"/> | #3  | (CI-1008):ti,ab,kw OR (CI1008):ti,ab,kw OR (gamma-Aminobutyric Acid):ti,ab,kw OR (GABA):ti,ab,kw                                                                              | S ▼    | Limits 3137   |
| <input type="checkbox"/> | <input type="checkbox"/> | <input type="checkbox"/> | #4  | #1 or #2 or #3                                                                                                                                                                | Limits | 5237          |
| <input type="checkbox"/> | <input type="checkbox"/> | <input type="checkbox"/> | #5  | MeSH descriptor: [Neoplasms] explode all trees                                                                                                                                | MeSH ▼ | 87970         |
| <input type="checkbox"/> | <input type="checkbox"/> | <input type="checkbox"/> | #6  | (Neoplasms):ti,ab,kw OR (Tumor):ti,ab,kw OR (Neoplasm):ti,ab,kw OR (Tumors):ti,ab,kw OR (Neoplasia):ti,ab,kw                                                                  | S ▼    | Limits 141384 |
| <input type="checkbox"/> | <input type="checkbox"/> | <input type="checkbox"/> | #7  | (Neoplasias):ti,ab,kw OR (Cancer):ti,ab,kw OR (Cancers):ti,ab,kw OR (Malignant Neoplasm):ti,ab,kw OR (Malignancy):ti,ab,kw                                                    | S ▼    | Limits 184068 |
| <input type="checkbox"/> | <input type="checkbox"/> | <input type="checkbox"/> | #8  | (Malignancies):ti,ab,kw OR (Malignant Neoplasms):ti,ab,kw OR (Neoplasm, Malignant):ti,ab,kw OR (Neoplasms, Malignant):ti,ab,kw OR (Benign                                     | S ▼    | Limits 16863  |
| <input type="checkbox"/> | <input type="checkbox"/> | <input type="checkbox"/> | #9  | (Benign Neoplasm):ti,ab,kw OR (Neoplasms, Benign):ti,ab,kw OR (Neoplasm, Benign):ti,ab,kw                                                                                     | S ▼    | Limits 3276   |
| <input type="checkbox"/> | <input type="checkbox"/> | <input type="checkbox"/> | #10 | #5 or #6 or #7 or #8 or #9                                                                                                                                                    | Limits | 239165        |
| <input type="checkbox"/> | <input type="checkbox"/> | <input type="checkbox"/> | #11 | MeSH descriptor: [General Surgery] explode all trees                                                                                                                          | MeSH ▼ | 366           |
| <input type="checkbox"/> | <input type="checkbox"/> | <input type="checkbox"/> | #12 | (General Surgery):ti,ab,kw OR (operative therapy):ti,ab,kw OR (invasive procedures):ti,ab,kw OR (operative procedures):ti,ab,kw OR (operations):ti,ab,kw                      | S ▼    | Limits 55290  |
| <input type="checkbox"/> | <input type="checkbox"/> | <input type="checkbox"/> | #13 | (perioperative procedures):ti,ab,kw OR (intraoperative procedures):ti,ab,kw OR (peroperative procedures):ti,ab,kw OR (preoperative procedures):ti,ab,kw OR (Surgery):ti,ab,kw | S ▼    | Limits 236390 |
| <input type="checkbox"/> | <input type="checkbox"/> | <input type="checkbox"/> | #14 | (Surgery, General):ti,ab,kw                                                                                                                                                   | S ▼    | Limits 26510  |
| <input type="checkbox"/> | <input type="checkbox"/> | <input type="checkbox"/> | #15 | MeSH descriptor: [Surgical Procedures, Operative] explode all trees                                                                                                           | MeSH ▼ | 128153        |
| <input type="checkbox"/> | <input type="checkbox"/> | <input type="checkbox"/> | #16 | #11 or #12 or #13 or #14 or #15                                                                                                                                               | Limits | 295723        |
| <input type="checkbox"/> | <input type="checkbox"/> | <input type="checkbox"/> | #17 | #4 and #10 and #16                                                                                                                                                            | Limits | 46            |

**Google Scholar (100)**

intitle: (Pregabalin) AND (Neoplasms OR Tumor OR Cancer) AND (General Surgery OR operative therapy OR Surgery OR Surgical Procedures, Operative) AND randomized

Ten pages of results (100 citations) included.

**CNKI (36)****Wan-Fang database (23)**



**Table S1: Risk of Bias Assessment**

1. Earsakul 2017

RoB 2 tool

| Bias                                               | Author's judgement | Support for judgement                                                                                                                                                                                                                                   |
|----------------------------------------------------|--------------------|---------------------------------------------------------------------------------------------------------------------------------------------------------------------------------------------------------------------------------------------------------|
| Bias arising from the randomization process        | Low risk           | Using a computer-generated random number table. Study medications were prepared in identical capsules, packed and sealed in opaque containers with labeled randomization number.                                                                        |
| Bias due to deviations from intended interventions | Low risk           | Double-blinded. Study medications were prepared in identical capsules, packed and sealed in opaque containers. The amount of intravenous agent and volatile agent were titrated by the attending anesthesiologist who was blinded to the randomization. |
| Bias due to missing outcome data                   | Low risk           | Analyses included almost all subjects. The exclusion of patients did not affect the study result.                                                                                                                                                       |
| Bias in measurement of the outcome                 | Low risk           | The method of measuring was appropriate. Per protocol and intention to treat were used to analyze the missing data.                                                                                                                                     |
| Bias in selection of the reported result           | Low risk           | Pre-specified outcomes reported.                                                                                                                                                                                                                        |
| Overall bias                                       | Low risk           | The overall risk of bias was classified as low risk.                                                                                                                                                                                                    |

2. Ghoneim 2013

RoB 2 tool

| Bias                                               | Author's judgement | Support for judgement                                                                                                                     |
|----------------------------------------------------|--------------------|-------------------------------------------------------------------------------------------------------------------------------------------|
| Bias arising from the randomization process        | Some concerns      | Using a computer generated random numbers table.                                                                                          |
| Bias due to deviations from intended interventions | High risk          | Patients were not blinded. All measurements were recorded by the same resident in charge who was blinded to the study drugs administered. |

|                                          |           |                                                                                                   |
|------------------------------------------|-----------|---------------------------------------------------------------------------------------------------|
| Bias due to missing outcome data         | Low risk  | Analyses included almost all subjects. The exclusion of patients did not affect the study result. |
| Bias in measurement of the outcome       | Low risk  | The method of measuring was appropriate.                                                          |
| Bias in selection of the reported result | Low risk  | Pre-specified outcomes reported.                                                                  |
| Overall bias                             | High risk | The overall risk of bias was classified as high risk.                                             |

### 3. Hetta 2016

#### RoB 2 tool

| Bias                                               | Author's judgement | Support for judgement                                                                                                                                                                                                                                   |
|----------------------------------------------------|--------------------|---------------------------------------------------------------------------------------------------------------------------------------------------------------------------------------------------------------------------------------------------------|
| Bias arising from the randomization process        | Low risk           | Using a computer-generated random number list.                                                                                                                                                                                                          |
| Bias due to deviations from intended interventions | Low risk           | The study drugs were packed in opaque plastic containers labeled with the randomization numbers. They masked the study medication by packing placebo and pregabalin into 2 identical capsules in color and appearance to make the drugs unrecognizable. |
| Bias due to missing outcome data                   | Low risk           | Analyses included almost all subjects. The exclusion of patients did not affect the study result.                                                                                                                                                       |
| Bias in measurement of the outcome                 | Low risk           | The method of measuring was appropriate. They masked the study medication by packing placebo and pregabalin into 2 identical capsules in color and appearance to make the drugs unrecognizable.                                                         |
| Bias in selection of the reported result           | Low risk           | Pre-specified outcomes reported.                                                                                                                                                                                                                        |
| Overall bias                                       | Low risk           | The overall risk of bias was classified as low risk.                                                                                                                                                                                                    |

### 4. Lamsal 2019

RoB 2 tool

| Bias                                               | Author's judgement | Support for judgement                                                                                                             |
|----------------------------------------------------|--------------------|-----------------------------------------------------------------------------------------------------------------------------------|
| Bias arising from the randomization process        | Low risk           | Using a computer-generated random number list. Each patient was given one envelope by a staff nurse who was unaware of the study. |
| Bias due to deviations from intended interventions | Low risk           | Double-Blind. The patients were blinded to the three study. The observers were blinded to the three study groups.                 |
| Bias due to missing outcome data                   | Some concerns      | There are likely errors that remain in pain scores and the information was insufficient to make a judgment.                       |
| Bias in measurement of the outcome                 | Low risk           | The method of measuring was appropriate.                                                                                          |
| Bias in selection of the reported result           | Low risk           | Pre-specified outcomes reported.                                                                                                  |
| Overall bias                                       | Some concerns      | The overall risk of bias was classified as some concerns.                                                                         |

5 Mahran 2015

RoB 2 tool

| Bias                                               | Author's judgement | Support for judgement                                                                                                                                                                                                 |
|----------------------------------------------------|--------------------|-----------------------------------------------------------------------------------------------------------------------------------------------------------------------------------------------------------------------|
| Bias arising from the randomization process        | Low risk           | Using a computer-generated random number assignment. Allocations were concealed in sequentially numbered sealed opaque envelopes.                                                                                     |
| Bias due to deviations from intended interventions | Low risk           | Both patients and postoperative assessors blinded to intraoperative management. An anesthesiologist not related to the management of the patient or study prepared the drugs of the study according to randomization. |
| Bias due to missing outcome data                   | Low risk           | Analyses included almost all subjects. The exclusion of patients did not affect the study result.                                                                                                                     |

|                                          |          |                                                      |
|------------------------------------------|----------|------------------------------------------------------|
| Bias in measurement of the outcome       | Low risk | The method of measuring was appropriate.             |
| Bias in selection of the reported result | Low risk | Pre-specified outcomes reported.                     |
| Overall bias                             | Low risk | The overall risk of bias was classified as low risk. |

#### 6. Mansor 2015

##### RoB 2 tool

| Bias                                               | Author's judgement | Support for judgement                                                                             |
|----------------------------------------------------|--------------------|---------------------------------------------------------------------------------------------------|
| Bias arising from the randomization process        | Low risk           | Using computer-generated randomized numbers.                                                      |
| Bias due to deviations from intended interventions | Low risk           | Patients were instructed to close their eyes before given the test drug to swallow.               |
| Bias due to missing outcome data                   | Low risk           | Analyses included almost all subjects. The exclusion of patients did not affect the study result. |
| Bias in measurement of the outcome                 | Low risk           | The method of measuring was appropriate.                                                          |
| Bias in selection of the reported result           | Low risk           | Pre-specified outcomes reported.                                                                  |
| Overall bias                                       | Low risk           | The overall risk of bias was classified as low risk.                                              |

#### 7. Mohamed 2016

##### RoB 2 tool

| Bias                                        | Author's judgement | Support for judgement                        |
|---------------------------------------------|--------------------|----------------------------------------------|
| Bias arising from the randomization process | Low risk           | Randomization was done using lottery method. |

|                                                    |          |                                                                                                                                            |
|----------------------------------------------------|----------|--------------------------------------------------------------------------------------------------------------------------------------------|
| Bias due to deviations from intended interventions | Low risk | Anesthesiologists and patients were blinded to the groups. Pregabalin was given orally by a staff nurse who was not included in the study. |
| Bias due to missing outcome data                   | Low risk | Analyses included almost all subjects. The exclusion of patients did not affect the study result.                                          |
| Bias in measurement of the outcome                 | Low risk | The method of measuring was appropriate.                                                                                                   |
| Bias in selection of the reported result           | Low risk | Pre-specified outcomes reported.                                                                                                           |
| Overall bias                                       | Low risk | The overall risk of bias was classified as low risk.                                                                                       |

#### 8. Patel 2016

##### RoB 2 tool

| Bias                                               | Author's judgement | Support for judgement                                                                             |
|----------------------------------------------------|--------------------|---------------------------------------------------------------------------------------------------|
| Bias arising from the randomization process        | Some concerns      | Ninety patients were randomly allocated in 3 Groups. Did not mention randomization method.        |
| Bias due to deviations from intended interventions | Some concerns      | The patients were randomized in a double-blind manner. Did not mention masking method.            |
| Bias due to missing outcome data                   | Low risk           | Analyses included almost all subjects. The exclusion of patients did not affect the study result. |
| Bias in measurement of the outcome                 | Low risk           | The method of measuring was appropriate.                                                          |
| Bias in selection of the reported result           | Low risk           | Pre-specified outcomes reported.                                                                  |
| Overall bias                                       | Some concerns      | The overall risk of bias was classified as some concerns.                                         |

#### 9. SK 2016

RoB 2 tool

| Bias                                               | Author's judgement | Support for judgement                                                                                                                                                                                                   |
|----------------------------------------------------|--------------------|-------------------------------------------------------------------------------------------------------------------------------------------------------------------------------------------------------------------------|
| Bias arising from the randomization process        | Low risk           | Using computer-generated randomized numbers.                                                                                                                                                                            |
| Bias due to deviations from intended interventions | Low risk           | The patients were randomized in a double-blind manner. Anesthesia by a staff nurse who was not involved in the study. Both these outcomes were assessed by an independent anesthesiologist blinded to group allocation. |
| Bias due to missing outcome data                   | Low risk           | Analyses included almost all subjects. The exclusion of patients did not affect the study result.                                                                                                                       |
| Bias in measurement of the outcome                 | Low risk           | The method of measuring was appropriate.                                                                                                                                                                                |
| Bias in selection of the reported result           | Low risk           | Pre-specified outcomes reported.                                                                                                                                                                                        |
| Overall bias                                       | Low risk           | The overall risk of bias was classified as low risk.                                                                                                                                                                    |

10. Pushkarna 2022

RoB 2 tool

| Bias                                               | Author's judgement | Support for judgement                                                                                                                                                                                |
|----------------------------------------------------|--------------------|------------------------------------------------------------------------------------------------------------------------------------------------------------------------------------------------------|
| Bias arising from the randomization process        | Low risk           | Randomization was carried out using random numbers. The coded slips which were then made were put in a sealed envelope. The hospital pharmacy prepared capsules identical in size, shape and colour. |
| Bias due to deviations from intended interventions | Low risk           | The patients remained blinded to the study drug. The assessors remained blinded to the study drug.                                                                                                   |
| Bias due to missing outcome data                   | Low risk           | Analyses included almost all subjects. The exclusion of patients did not affect the study result.                                                                                                    |

|                                          |          |                                                      |
|------------------------------------------|----------|------------------------------------------------------|
| Bias in measurement of the outcome       | Low risk | The method of measuring was appropriate.             |
| Bias in selection of the reported result | Low risk | Pre-specified outcomes reported.                     |
| Overall bias                             | Low risk | The overall risk of bias was classified as low risk. |

#### 11. Salah 2018

##### RoB 2 tool

| Bias                                               | Author's judgement | Support for judgement                                                                                                                           |
|----------------------------------------------------|--------------------|-------------------------------------------------------------------------------------------------------------------------------------------------|
| Bias arising from the randomization process        | Some concerns      | The patients are randomly allocated into two groups. Did not mention randomization method. This study was randomized by sealed opaque envelope. |
| Bias due to deviations from intended interventions | Low risk           | The patients were not informed about the administered medications. The residents were not informed about the administered medications.          |
| Bias due to missing outcome data                   | Low risk           | Analyses included almost all subjects. The exclusion of patients did not affect the study result.                                               |
| Bias in measurement of the outcome                 | Low risk           | The method of measuring was appropriate.                                                                                                        |
| Bias in selection of the reported result           | Low risk           | Pre-specified outcomes reported.                                                                                                                |
| Overall bias                                       | Some concerns      | The overall risk of bias was classified as some concerns.                                                                                       |

#### 12. Zhang 2012

##### RoB 2 tool

| Bias                                        | Author's judgement | Support for judgement                                                                      |
|---------------------------------------------|--------------------|--------------------------------------------------------------------------------------------|
| Bias arising from the randomization process | Some concerns      | The patients are randomly allocated into two groups. Did not mention randomization method. |

|                                                    |               |                                                                                                   |
|----------------------------------------------------|---------------|---------------------------------------------------------------------------------------------------|
| Bias due to deviations from intended interventions | Some concerns | The patients were randomized in a double-blind manner. Did not mention masking method.            |
| Bias due to missing outcome data                   | Low risk      | Analyses included almost all subjects. The exclusion of patients did not affect the study result. |
| Bias in measurement of the outcome                 | Low risk      | The method of measuring was appropriate.                                                          |
| Bias in selection of the reported result           | Low risk      | Pre-specified outcomes reported.                                                                  |
| Overall bias                                       | Some concerns | The overall risk of bias was classified as some concerns.                                         |

### 13. Zhang 2016

#### RoB 2 tool

| Bias                                               | Author's judgement | Support for judgement                                                                             |
|----------------------------------------------------|--------------------|---------------------------------------------------------------------------------------------------|
| Bias arising from the randomization process        | Some concerns      | The patients are randomly allocated into two groups. Did not mention randomization method.        |
| Bias due to deviations from intended interventions | Some concerns      | The patients were randomized in a double-blind manner. Did not mention masking method.            |
| Bias due to missing outcome data                   | Low risk           | Analyses included almost all subjects. The exclusion of patients did not affect the study result. |
| Bias in measurement of the outcome                 | Low risk           | The method of measuring was appropriate.                                                          |
| Bias in selection of the reported result           | Low risk           | Pre-specified outcomes reported.                                                                  |
| Overall bias                                       | Some concerns      | The overall risk of bias was classified as some concerns.                                         |



**Table S2:** GRADE quality of evidence summary table

**Patient or population:** Patients who underwent cancer-related surgery

**Settings:** RCTs.

**Intervention:** Pregabalin was administered preoperatively.

**Comparison:** The control interventions were placebo or no treatment.

| Outcomes | Illustrative comparative risks* (97.5% CI or 95% CI) |                             | Relative effect (97.5% CI or 95% CI) | No of Participants (studies) | Quality of the evidence (GRADE) | Comments |
|----------|------------------------------------------------------|-----------------------------|--------------------------------------|------------------------------|---------------------------------|----------|
|          | Assumed risk Control                                 | Corresponding risk Outcomes |                                      |                              |                                 |          |

**The primary outcomes**

|                                                             |  |                                                                                                                                            |                        |                 |                                |                                                                                                            |
|-------------------------------------------------------------|--|--------------------------------------------------------------------------------------------------------------------------------------------|------------------------|-----------------|--------------------------------|------------------------------------------------------------------------------------------------------------|
| <b>Resting pain scores at 24 hours postoperatively (cm)</b> |  | The mean resting pain scores at 24 hours postoperatively (cm) in the intervention groups was <b>0.45 lower</b> (0.66 to 0.24 lower)        | -0.45 (-0.68 to -0.21) | 580 (9 studies) | ⊕⊕○○ <b>low</b> <sup>1,2</sup> | Pregabalin likely results in <b>a certain decrease</b> in resting pain scores at 24 hours postoperatively. |
| <b>Dynamic pain scores at 24 hours postoperatively (cm)</b> |  | The mean dynamic pain scores at 24 hours postoperatively (cm) in the intervention groups was <b>0.31 lower</b> (0.77 lower to 0.15 higher) | -0.31 (-0.83 to 0.22)  | 490 (7 studies) | ⊕⊕○○ <b>low</b> <sup>1,2</sup> | Pregabalin likely results in <b>no difference</b> in dynamic pain scores at 24 hours postoperatively.      |

**The secondary outcomes**

|                                                            |                                                                                                                                          |                        |                 |                                     |                                                                                                           |
|------------------------------------------------------------|------------------------------------------------------------------------------------------------------------------------------------------|------------------------|-----------------|-------------------------------------|-----------------------------------------------------------------------------------------------------------|
| <b>Resting pain scores at 1 hour postoperatively (cm)</b>  | The mean resting pain scores at 1 hour postoperatively (cm) in the intervention groups was <b>1.56 lower</b> (3.63 lower to 0.52 higher) | -1.56 (-3.63 to 0.52)  | 165 (2 studies) | ⊕⊕⊕○ <b>moderate</b> <sup>2</sup>   | Pregabalin likely results in <b>no difference</b> in resting pain scores at 1 hours postoperatively.      |
| <b>Resting pain scores at 2 hours postoperatively (cm)</b> | The mean resting pain scores at 2 hours postoperatively (cm) in the intervention groups was <b>1.53 lower</b> (2.3 to 0.77 lower)        | -1.53 (-2.30 to -0.77) | 510 (7 studies) | ⊕⊕⊕○ <b>moderate</b> <sup>2</sup>   | Pregabalin likely results in <b>a certain decrease</b> in resting pain scores at 2 hours postoperatively. |
| <b>Resting pain scores at 4 hours postoperatively (cm)</b> | The mean resting pain scores at 4 hours postoperatively (cm) in the intervention groups was <b>0.53 lower</b> (0.98 to 0.08 lower)       | -0.53 (-0.98 to -0.08) | 465 (7 studies) | ⊕⊕○○ <b>low</b> <sup>2,4</sup>      | Pregabalin likely results in <b>a certain decrease</b> in resting pain scores at 4 hours postoperatively. |
| <b>Resting pain scores at 6 hours postoperatively (cm)</b> | The mean resting pain scores at 6 hours postoperatively (cm) in the intervention groups was <b>0.87 lower</b> (1.58 to 0.16 lower)       | -0.87 (-1.58 to -0.16) | 429 (7 studies) | ⊕⊕⊕○ <b>moderate</b> <sup>2,3</sup> | Pregabalin likely results in <b>a certain decrease</b> in resting pain scores at 6 hours postoperatively. |
| <b>Resting pain scores at 8 hours postoperatively (cm)</b> | The mean resting pain scores at 8 hours postoperatively (cm) in the intervention groups was <b>0.64 lower</b> (0.96 to 0.32 lower)       | -0.64 (-0.96 to -0.32) | 311 (4 studies) | ⊕⊕○○ <b>low</b> <sup>1,2</sup>      | Pregabalin likely results in <b>a certain decrease</b> in resting pain scores at 8 hours postoperatively. |

|                                                             |                                                                                                                                            |                        |                 |                                      |                                                                                                            |
|-------------------------------------------------------------|--------------------------------------------------------------------------------------------------------------------------------------------|------------------------|-----------------|--------------------------------------|------------------------------------------------------------------------------------------------------------|
| <b>Resting pain scores at 12 hours postoperatively (cm)</b> | The mean resting pain scores at 12 hours postoperatively (cm) in the intervention groups was <b>0.59 lower</b> (1.06 to 0.12 lower)        | -0.59 (-1.06 to -0.12) | 500 (8 studies) | ⊕⊕○○<br><b>low</b> <sup>1,2</sup>    | Pregabalin likely results in <b>a certain decrease</b> in resting pain scores at 12 hours postoperatively. |
| <b>Resting pain scores at 16 hours postoperatively (cm)</b> | The mean resting pain scores at 16 hours postoperatively (cm) in the intervention groups was <b>1.07 lower</b> (1.88 to 0.25 lower)        | -1.07 (-1.88 to -0.25) | 246 (3 studies) | ⊕⊕○○<br><b>low</b> <sup>1,2</sup>    | Pregabalin likely results in <b>a certain decrease</b> in resting pain scores at 16 hours postoperatively. |
| <b>Resting pain scores at 20 hours postoperatively (cm)</b> | The mean resting pain scores at 20 hours postoperatively (cm) in the intervention groups was <b>0.61 lower</b> (1.18 to 0.05 lower)        | -0.61 (-1.18 to -0.05) | 135 (2 studies) | ⊕⊕○○<br><b>low</b> <sup>1,2</sup>    | Pregabalin likely results in <b>a certain decrease</b> in resting pain scores at 20 hours postoperatively. |
| <b>Resting pain scores at 48 hours postoperatively (cm)</b> | The mean resting pain scores at 48 hours postoperatively (cm) in the intervention groups was <b>0.13 lower</b> (0.42 lower to 0.15 higher) | -0.13 (-0.42 to 0.15)  | 90 (2 studies)  | ⊕⊕⊕○<br><b>moderate</b> <sup>1</sup> | Pregabalin likely results in <b>no difference</b> in resting pain scores at 48 hours postoperatively.      |
| <b>Dynamic pain scores at 2 hours postoperatively (cm)</b>  | The mean dynamic pain scores at 2 hours postoperatively (cm) in the intervention groups was <b>1.16 lower</b> (2.22 to 0.11 lower)         | -1.16 (-2.22 to -0.11) | 400 (5 studies) | ⊕⊕⊕○<br><b>moderate</b> <sup>2</sup> | Pregabalin likely results in <b>a certain decrease</b> in dynamic pain scores at 2 hours postoperatively.  |

|                                                             |                                                                                                                                            |                        |                 |                                      |                                                                                                            |
|-------------------------------------------------------------|--------------------------------------------------------------------------------------------------------------------------------------------|------------------------|-----------------|--------------------------------------|------------------------------------------------------------------------------------------------------------|
| <b>Dynamic pain scores at 4 hours postoperatively (cm)</b>  | The mean dynamic pain scores at 4 hours postoperatively (cm) in the intervention groups was <b>0.53 lower</b> (0.97 to 0.1 lower)          | -0.53 (-0.97 to -0.10) | 280 (4 studies) | ⊕⊕○○<br><b>low</b> <sup>1,2</sup>    | Pregabalin likely results in <b>a certain decrease</b> in dynamic pain scores at 4 hours postoperatively.  |
| <b>Dynamic pain scores at 6 hours postoperatively (cm)</b>  | The mean dynamic pain scores at 6 hours postoperatively (cm) in the intervention groups was <b>1.03 lower</b> (1.83 to 0.23 lower)         | -1.03 (-1.83 to -0.23) | 319 (5 studies) | ⊕⊕⊕○<br><b>moderate</b> <sup>2</sup> | Pregabalin likely results in <b>a certain decrease</b> in dynamic pain scores at 6 hours postoperatively.  |
| <b>Dynamic pain scores at 8 hours postoperatively (cm)</b>  | The mean dynamic pain scores at 8 hours postoperatively (cm) in the intervention groups was <b>0.36 lower</b> (0.78 lower to 0.06 higher)  | -0.36 (-0.78 to 0.06)  | 171 (2 studies) | ⊕⊕○○<br><b>low</b> <sup>1,2</sup>    | Pregabalin likely results in <b>no difference</b> in dynamic pain scores at 8 hours postoperatively.       |
| <b>Dynamic pain scores at 12 hours postoperatively (cm)</b> | The mean dynamic pain scores at 12 hours postoperatively (cm) in the intervention groups was <b>0.85 lower</b> (1.49 to 0.21 lower)        | -0.85 (-1.49 to -0.21) | 330 (5 studies) | ⊕⊕○○<br><b>low</b> <sup>1,2</sup>    | Pregabalin likely results in <b>a certain decrease</b> in dynamic pain scores at 12 hours postoperatively. |
| <b>Dynamic pain scores at 16 hours postoperatively (cm)</b> | The mean dynamic pain scores at 16 hours postoperatively (cm) in the intervention groups was <b>0.26 lower</b> (0.54 lower to 0.02 higher) | -0.26 (-0.54 to 0.02)  | 171 (2 studies) | ⊕⊕⊕○<br><b>moderate</b> <sup>1</sup> | Pregabalin likely results in <b>no difference</b> in dynamic pain scores at 16 hours postoperatively.      |

|                                                                        |                                                                                                                                                          |                          |                  |                                            |                                                                                                                       |
|------------------------------------------------------------------------|----------------------------------------------------------------------------------------------------------------------------------------------------------|--------------------------|------------------|--------------------------------------------|-----------------------------------------------------------------------------------------------------------------------|
| <b>Dynamic pain scores at 48 hours postoperatively (cm)</b>            | The mean dynamic pain scores at 48 hours postoperatively (cm) in the intervention groups was <b>0.31 lower</b> (1.17 lower to 0.54 higher)               | -0.31 (-1.17 to 0.54)    | 90 (2 studies)   | ⊕⊕○○<br><b>low</b> <sup>1,2</sup>          | Pregabalin likely results in <b>no difference</b> in dynamic pain scores at 48 hours postoperatively.                 |
| <b>Cumulative morphine equivalent consumption within 12 hours (mg)</b> | The mean cumulative morphine equivalent consumption within 12 hours (mg) in the intervention groups was <b>1.77 lower</b> (6.77 lower to 3.24 higher)    | -1.77 (-6.77 to 3.24)    | 110 (2 studies)  | ⊕⊕⊕○<br><b>moderate</b> <sup>2</sup>       | Pregabalin likely results in <b>no difference</b> in cumulative morphine equivalent consumption within 12 hours.      |
| <b>Cumulative morphine equivalent consumption within 24 hours (mg)</b> | The mean cumulative morphine equivalent consumption within 24 hours (mg) in the intervention groups was <b>7.45 lower</b> (9.3 to 5.6 lower)             | -7.45 (-9.30 to -5.60)   | 646 (10 studies) | ⊕○○○<br><b>very low</b> <sup>1,2,4</sup>   | Pregabalin likely results in <b>a certain decrease</b> in cumulative morphine equivalent consumption within 24 hours. |
| <b>Cumulative morphine equivalent consumption within 48 hours (mg)</b> | The mean cumulative morphine equivalent consumption within 48 hours (mg) in the intervention groups was <b>29.93 lower</b> (81.99 lower to 22.13 higher) | -29.93 (-81.99 to 22.13) | 90 (2 studies)   | ⊕○○○<br><b>very low</b> <sup>1,2,4</sup>   | Pregabalin likely results in <b>no difference</b> in cumulative morphine equivalent consumption within 48 hours.      |
| <b>Time to first analgesic request (hours)</b>                         | The mean time to first analgesic request (hours) in the intervention groups was <b>2.28 higher</b> (0.79 to 3.77 higher)                                 | 2.28 (0.79 to 3.77)      | 255 (4 studies)  | ⊕○○○<br><b>very low</b> <sup>1,2,3,4</sup> | Pregabalin likely results in <b>a certain increase</b> in time to first analgesic request.                            |

## Hemodynamic parameters

|                                              |                                                                                                                               |                               |                    |                                      |                                                                                    |
|----------------------------------------------|-------------------------------------------------------------------------------------------------------------------------------|-------------------------------|--------------------|--------------------------------------|------------------------------------------------------------------------------------|
| <b>Heart rate at 2 hours<br/>(beat/min)</b>  | The mean heart rate at 2 hours (beat/min) in the intervention groups was<br><b>2.81 lower</b><br>(7.71 lower to 2.08 higher)  | -2.81 (-7.71<br>to 2.08)      | 135<br>(2 studies) | ⊕⊕⊕⊕<br><b>high</b>                  | Pregabalin likely results in<br><b>no difference</b> in heart rate<br>at 2 hours.  |
| <b>Heart rate at 6 hours<br/>(beat/min)</b>  | The mean heart rate at 6 hours (beat/min) in the intervention groups was<br><b>2.53 lower</b><br>(7.59 lower to 2.53 higher)  | -2.53 (-7.59<br>to 2.53)      | 135<br>(2 studies) | ⊕⊕⊕⊕<br><b>high</b>                  | Pregabalin likely results in<br><b>no difference</b> in heart rate<br>at 6 hours.  |
| <b>Heart rate at 12 hours<br/>(beat/min)</b> | The mean heart rate at 12 hours (beat/min) in the intervention groups was<br><b>3.83 lower</b><br>(8.59 lower to 0.92 higher) | -3.83 (-8.59<br>to 0.92)      | 135<br>(2 studies) | ⊕⊕⊕⊕<br><b>high</b>                  | Pregabalin likely results in<br><b>no difference</b> in heart rate<br>at 12 hours. |
| <b>Heart rate at 24 hours<br/>(beat/min)</b> | The mean heart rate at 24 hours (beat/min) in the intervention groups was<br><b>2.73 lower</b><br>(7.44 lower to 1.98 higher) | -2.73 (-7.44<br>to 1.98)      | 135<br>(2 studies) | ⊕⊕⊕⊕<br><b>high</b>                  | Pregabalin likely results in<br><b>no difference</b> in heart rate<br>at 24 hours. |
| <b>SBP at 2 hours<br/>(mm/Hg)</b>            | The mean SBP at 2 hours (mm/hg) in the intervention groups was                                                                | -9.14 (-<br>19.88 to<br>1.59) | 135<br>(2 studies) | ⊕⊕⊕⊕<br><b>moderate</b> <sup>2</sup> | Pregabalin likely results in<br><b>no difference</b> in SBP at 2<br>hours.         |

|                                    |                                                                                                                       |                       |                    |                                      |                                                                       |
|------------------------------------|-----------------------------------------------------------------------------------------------------------------------|-----------------------|--------------------|--------------------------------------|-----------------------------------------------------------------------|
|                                    | <b>9.14 lower</b><br>(19.88 lower to 1.59 higher)                                                                     |                       |                    |                                      |                                                                       |
| <b>SBP at 6 hours<br/>(mm/Hg)</b>  | The mean SBP at 6 hours (mm/hg) in the intervention groups was<br><b>1.79 lower</b><br>(6.31 lower to 2.72 higher)    | -1.79 (-6.31 to 2.72) | 135<br>(2 studies) | ⊕⊕⊕⊕<br><b>high</b>                  | Pregabalin likely results in <b>no difference</b> in SBP at 6 hours.  |
| <b>SBP at 12 hours<br/>(mm/Hg)</b> | The mean SBP at 12 hours (mm/hg) in the intervention groups was<br><b>3.31 higher</b><br>(5.59 lower to 12.22 higher) | 3.31 (-5.59 to 12.22) | 135<br>(2 studies) | ⊕⊕⊕○<br><b>moderate</b> <sup>2</sup> | Pregabalin likely results in <b>no difference</b> in SBP at 12 hours. |
| <b>SBP at 24 hours<br/>(mm/Hg)</b> | The mean SBP at 24 hours (mm/hg) in the intervention groups was<br><b>0.25 higher</b><br>(4.59 lower to 5.08 higher)  | 0.25 (-4.59 to 5.08)  | 135<br>(2 studies) | ⊕⊕⊕⊕<br><b>high</b>                  | Pregabalin likely results in <b>no difference</b> in SBP at 24 hours. |
| <b>DBP at 2 hours<br/>(mm/Hg)</b>  | The mean DBP at 2 hours (mm/hg) in the intervention groups was<br><b>0.13 lower</b><br>(4.06 lower to 3.81 higher)    | -0.13 (-4.06 to 3.81) | 135<br>(2 studies) | ⊕⊕⊕⊕<br><b>high</b>                  | Pregabalin likely results in <b>no difference</b> in DBP at 2 hours.  |
| <b>DBP at 6 hours<br/>(mm/Hg)</b>  | The mean DBP at 6 hours (mm/hg) in the intervention groups was<br><b>2.26 lower</b><br>(5.45 lower to 0.93 higher)    | -2.26 (-5.45 to 0.93) | 135<br>(2 studies) | ⊕⊕⊕⊕<br><b>high</b>                  | Pregabalin likely results in <b>no difference</b> in DBP at 6 hours.  |
| <b>DBP at 12 hours<br/>(mm/Hg)</b> | The mean DBP at 12 hours (mm/hg) in the intervention groups was                                                       | 1.99 (-8.60 to 12.58) | 135<br>(2 studies) | ⊕⊕⊕○<br><b>moderate</b> <sup>2</sup> | Pregabalin likely results in <b>no difference</b> in DBP at 12 hours. |

|                                    |                                                                                                                    |                       |                    |                                      |                                                                       |
|------------------------------------|--------------------------------------------------------------------------------------------------------------------|-----------------------|--------------------|--------------------------------------|-----------------------------------------------------------------------|
|                                    | <b>1.99 higher</b><br>(8.6 lower to 12.58 higher)                                                                  |                       |                    |                                      |                                                                       |
| <b>DBP at 24 hours<br/>(mm/Hg)</b> | The mean DBP at 24 hours (mm/hg) in the intervention groups was<br><b>1.55 lower</b><br>(6.59 lower to 3.5 higher) | -1.55 (-6.59 to 3.50) | 135<br>(2 studies) | ⊕⊕⊕○<br><b>moderate</b> <sup>2</sup> | Pregabalin likely results in <b>no difference</b> in DBP at 24 hours. |

### The safety outcomes

|                    |                  |                              |                           |                    |                               |                                                                                              |
|--------------------|------------------|------------------------------|---------------------------|--------------------|-------------------------------|----------------------------------------------------------------------------------------------|
| Dizziness          | Study population |                              | RR 2.81<br>(1.75 to 4.53) | 490<br>(7 studies) | ⊕⊕⊕○<br>moderate <sup>1</sup> | Pregabalin likely results in<br>a certain increase in<br>incidence of dizziness.             |
|                    | 91 per 1000      | 257 per 1000<br>(160 to 414) |                           |                    |                               |                                                                                              |
|                    | Moderate         |                              |                           |                    |                               |                                                                                              |
|                    | 33 per 1000      | 93 per 1000<br>(58 to 149)   |                           |                    |                               |                                                                                              |
| Visual disturbance | Study population |                              | RR 3.04<br>(1.37 to 6.73) | 415<br>(6 studies) | ⊕⊕⊕○<br>moderate <sup>1</sup> | Pregabalin likely results in<br>a certain increase in<br>incidence of visual<br>disturbance. |
|                    | 38 per 1000      | 115 per 1000<br>(52 to 254)  |                           |                    |                               |                                                                                              |
|                    | Moderate         |                              |                           |                    |                               |                                                                                              |
|                    | 0 per 1000       | 0 per 1000<br>(0 to 0)       |                           |                    |                               |                                                                                              |
| Pruritus           | Study population |                              | RR 0.14<br>(0.02 to 1.02) | 220<br>(4 studies) | ⊕⊕⊕○<br>moderate <sup>1</sup> | Pregabalin likely results in<br>no difference in incidence<br>of pruritus.                   |
|                    | 43 per 1000      | 6 per 1000<br>(1 to 44)      |                           |                    |                               |                                                                                              |
|                    | Moderate         |                              |                           |                    |                               |                                                                                              |



|                                   |                                                                                                             |                                     |                                  |                     |                                      |                                                                                       |
|-----------------------------------|-------------------------------------------------------------------------------------------------------------|-------------------------------------|----------------------------------|---------------------|--------------------------------------|---------------------------------------------------------------------------------------|
|                                   | <b>17 per 1000</b>                                                                                          | <b>2 per 1000</b><br>(0 to 17)      |                                  |                     |                                      |                                                                                       |
| <b>Headache</b>                   | <b>Study population</b>                                                                                     |                                     | <b>RR 1.71</b><br>(0.88 to 3.31) | 295<br>(4 studies)  | ⊕⊕⊕⊕<br><b>high</b>                  | Pregabalin likely results in <b>no difference</b> in incidence of headache.           |
|                                   | <b>111 per 1000</b>                                                                                         | <b>190 per 1000</b><br>(98 to 368)  |                                  |                     |                                      |                                                                                       |
|                                   | <b>Moderate</b>                                                                                             |                                     |                                  |                     |                                      |                                                                                       |
|                                   | <b>50 per 1000</b>                                                                                          | <b>86 per 1000</b><br>(44 to 165)   |                                  |                     |                                      |                                                                                       |
| <b>Sedation score at 12 hours</b> | The mean sedation score at 12 hours in the intervention groups was <b>0.35 higher</b> (0.15 to 0.55 higher) |                                     | 0.35 (0.15 to 0.55)              | 230<br>(3 studies)  | ⊕⊕⊕⊕<br><b>high</b>                  | Pregabalin likely results in <b>a certain increase</b> in sedation score at 12 hours. |
| <b>Sedation score at 24 hours</b> | The mean sedation score at 24 hours in the intervention groups was <b>0.5 higher</b> (0.15 to 0.86 higher)  |                                     | 0.50 (0.15 to 0.86)              | 261<br>(3 studies)  | ⊕⊕⊕○<br><b>moderate</b> <sup>2</sup> | Pregabalin likely results in <b>a certain increase</b> in sedation score at 24 hours. |
| <b>PONV</b>                       | <b>Study population</b>                                                                                     |                                     | <b>RR 0.59</b><br>(0.39 to 0.87) | 670<br>(10 studies) | ⊕⊕○○<br><b>low</b> <sup>1,2</sup>    | Pregabalin likely results in <b>a certain decrease</b> in incidence of PONV.          |
|                                   | <b>372 per 1000</b>                                                                                         | <b>219 per 1000</b><br>(145 to 324) |                                  |                     |                                      |                                                                                       |
|                                   | <b>Moderate</b>                                                                                             |                                     |                                  |                     |                                      |                                                                                       |
|                                   | <b>350 per 1000</b>                                                                                         | <b>206 per 1000</b><br>(136 to 305) |                                  |                     |                                      |                                                                                       |

\*The basis for the **assumed risk** (e.g., the median control group risk across studies) is provided in footnotes. The **corresponding risk** (and its 95% or 99% confidence interval) is based on the assumed risk in the comparison group and the **relative effect** of the intervention (and its 95% CI or 99%

---

CI).

**Abbreviation:** **GRADE:** Grades of Recommendation, Assessment, Development, and Evaluation; **RCTs:** Randomized controlled trials; **CI:** Confidence interval; **RR:** Risk ratio; **N:** Number; **cm:** centimeter; **mg:** milligrams; **SBP:** systolic blood pressure; **DBP:** diastolic blood pressure; **PONV:** Postoperative Nausea and Vomiting.

---

GRADE Working Group grades of evidence

**High quality:** Further research is very unlikely to change our confidence in the estimate of effect.

**Moderate quality:** Further research is likely to have an important impact on our confidence in the estimate of effect and may change the estimate.

**Low quality:** Further research is very likely to have an important impact on our confidence in the estimate of effect and is likely to change the estimate.

**Very low quality:** We are very uncertain about the estimate.

---

<sup>1</sup> High risk of bias

<sup>2</sup> High heterogeneity

<sup>3</sup> Some evidence of imprecision such as wide confidence interval due to small sample size

<sup>4</sup> Publication bias

---

**Table S3:** Meta-regression analysis for primary outcomes

| Subgroup                                                    | N of studies | R <sup>2</sup> * | Wald Chi <sup>2</sup> | <i>p</i> |
|-------------------------------------------------------------|--------------|------------------|-----------------------|----------|
| <b>Resting pain scores at 24 hours postoperatively (cm)</b> |              |                  |                       |          |
| Types of cancer                                             | 9            | 0                | 0.14                  | 0.712    |
| Dose of pregabalin                                          | 13           | 0                | 0.06                  | 0.800    |
| Types of surgery                                            | 9            | 0                | 0.20                  | 0.654    |
| Methods of postoperative rescue analgesia                   | 9            | 0.23             | 3.66                  | 0.056    |
| Surgical site                                               | 9            | 0                | 0.13                  | 0.717    |
| Postoperative multimodal analgesia                          | 9            | 0.22             | 1.63                  | 0.202    |
| <b>Dynamic pain scores at 24 hours postoperatively (cm)</b> |              |                  |                       |          |
| Types of cancer                                             | 7            | 0                | 0.04                  | 0.847    |
| Dose of pregabalin                                          | 10           | 0                | 0.29                  | 0.587    |
| Types of surgery                                            | 7            | 0                | 0.07                  | 0.890    |
| Methods of postoperative rescue analgesia                   | 7            | 0.54             | 3.95                  | 0.047    |
| Surgical site                                               | 7            | 0                | 0.04                  | 0.846    |
| Postoperative multimodal analgesia                          | 7            | 0.437            | 1.12                  | 0.290    |

\* An R<sup>2</sup> value (coefficient of determination) was calculated to help quantify the extent of a covariate explained the variation in data. An R<sup>2</sup>=1 denoted that the covariate explained all the variability, while an R<sup>2</sup>=0 denoted that the covariate did not explain any of the variability.

**Abbreviation:** N: Number; N/A: Not applicable; cm: centimeter.

**Table S4A:** Subgroup analyses for primary and safety outcomes

| Subgroup                                                    | Subgroup category | Included studies                                                                             | N of studies | WMD or RR (95% CI or 97.5% CI) | Model | <i>P</i> | <i>I</i> <sup>2</sup> test (%) |
|-------------------------------------------------------------|-------------------|----------------------------------------------------------------------------------------------|--------------|--------------------------------|-------|----------|--------------------------------|
| <b>The primary outcomes</b>                                 |                   |                                                                                              |              |                                |       |          |                                |
| <b>Dynamic pain scores at 24 hours postoperatively (cm)</b> |                   |                                                                                              |              |                                |       |          |                                |
| Methods of postoperative rescue analgesia                   | PCA               | Earsakul 2017, Ghoneim 2013, Hetta 2016, Mahran 2015                                         | 4            | -0.14 (-0.42, 0.13)            | Radom | 0.39     | 0                              |
|                                                             | IV                | Mansor 2015                                                                                  | 1            | -0.01 (-0.20, 0.18)            | Radom | N/A      | N/A                            |
|                                                             | IM                | Patel 2016, Zhang 2016                                                                       | 2            | -0.87 (-1.42, -0.33)           | Radom | 0.01     | 86.11                          |
| <b>The safety outcomes</b>                                  |                   |                                                                                              |              |                                |       |          |                                |
| <b>Dizziness</b>                                            |                   |                                                                                              |              |                                |       |          |                                |
| Dose of pregabalin                                          | Low dose          | Ghoneim 2013, Hetta 2016 a, Hetta 2016 b, Mahran 2015, Mansor 2015, Patel 2016 a, Zhang 2012 | 7            | 2.20 (1.38, 3.48)              | Fixed | <0.001   | 0                              |
|                                                             | High dose         | Hetta 2016 c, Mohamed 2016 a, Mohamed 2016 b, Patel 2016 b                                   | 4            | 9.25 (3.22, 26.54)             | Fixed | <0.001   | 9                              |
| <b>Visual disturbance</b>                                   |                   |                                                                                              |              |                                |       |          |                                |

|                                   |           |                                                                                  |   |                    |       |        |     |
|-----------------------------------|-----------|----------------------------------------------------------------------------------|---|--------------------|-------|--------|-----|
| Dose of pregabalin                | Low dose  | Ghoneim 2013, Hetta 2016 a, Hetta 2016 b, Mahran 2015, Mansor 2015, Patel 2016 a | 6 | 2.13 (1.02, 4.47)  | Fixed | 0.05   | 0   |
|                                   | High dose | Hetta 2016 c, Mohamed 2016 a, Mohamed 2016 b, Patel 2016 b                       | 4 | 7.25 (2.75, 19.07) | Fixed | <0.001 | 0   |
| <b>Pruritus</b>                   |           |                                                                                  |   |                    |       |        |     |
| Dose of pregabalin                | Low dose  | Ghoneim 2013, Lamsal 2019 a, Lamsal 2019 b, Pushkarna 2022                       | 4 | 0.33 (0.01, 7.87)  | Fixed | N/A    | N/A |
|                                   | High dose | Mohamed 2016 a, Mohamed 2016 b                                                   | 2 | 0.14 (0.02, 1.10)  | Fixed | 0.06   | 0   |
| <b>Headache</b>                   |           |                                                                                  |   |                    |       |        |     |
| Dose of pregabalin                | Low dose  | Hetta 2016 a, Hetta 2016 b, Mansor 2015, Patel 2016 a                            | 4 | 1.33 (0.70, 2.53)  | Fixed | 0.38   | 0   |
|                                   | High dose | Hetta 2016 c, Mohamed 2016 a, Patel 2016 b, Mohamed 2016 b                       | 4 | 5.11 (1.70, 15.36) | Fixed | 0.004  | 0   |
| <b>Sedation score at 12 hours</b> |           |                                                                                  |   |                    |       |        |     |
| Dose of pregabalin                | Low dose  | Patel 2016 a, SK 2016                                                            | 2 | 0.35 (0.15, 0.55)  | Fixed | <0.001 | N/A |
|                                   | High dose | Patel 2016 b, Salah 2018                                                         | 2 | N/A                | Fixed | N/A    | N/A |

| Sedation score at 24 hours |           |                                                                                                                                         |    |                    |       |        |    |
|----------------------------|-----------|-----------------------------------------------------------------------------------------------------------------------------------------|----|--------------------|-------|--------|----|
| Dose of pregabalin         | Low dose  | Hetta 2016 a, Hetta 2016 b, Patel 2016 a                                                                                                | 3  | 0.14 (-0.09, 0.37) | Fixed | 0.23   | 0  |
|                            | High dose | Hetta 2016 c, Patel 2016 b, Salah 2018                                                                                                  | 3  | 0.76 (0.54, 0.97)  | Fixed | <0.001 | 0  |
| POVN                       |           |                                                                                                                                         |    |                    |       |        |    |
| Dose of pregabalin         | Low dose  | Ghoneim 2013, Hetta 2016 a, Hetta 2016 b, Lamsal 2019 a, Lamsal 2019 b, Mahran 2015, Mansor 2015, Patel 2016 a, SK 2016, Pushkarna 2022 | 10 | 0.70 (0.55, 0.90)  | Radom | 0.005  | 24 |
|                            | High dose | Hetta 2016 c, Mohamed 2016 a, Mohamed 2016 b, Patel 2016 b, Salah 2018                                                                  | 5  | 0.32 (0.19, 0.52)  | Radom | <0.001 | 0  |

**Abbreviation:** N: Number; **WMD:** Weighted mean difference; **RR:** Risk ratio; **CI:** Confidence interval; **I<sup>2</sup>:** I-square; **N/A:** Not applicable; **PCA:** Patient controlled analgesia; **IV:** Intravenous injection; **IM:** Intramuscular injection; **PONV:** Postoperative Nausea and Vomiting.

**Table S4B:** Predefined sensitivity analyses for primary outcomes

| Deleted Studies                                             | WMD<br>(97.5% CI)    | Model  | <i>P</i> | <i>I</i> <sup>2</sup> test (%) | N of studies |
|-------------------------------------------------------------|----------------------|--------|----------|--------------------------------|--------------|
| <b>Resting pain scores at 24 hours postoperatively (cm)</b> |                      |        |          |                                |              |
| Mansor 2015                                                 | -0.49 (-0.76, -0.22) | Radom  | <0.001   | 54.69                          | 8            |
| <b>Dynamic pain scores at 24 hours postoperatively (cm)</b> |                      |        |          |                                |              |
| Mansor 2015                                                 | -0.38 (-0.91, 0.15)  | Random | 0.11     | 88.71                          | 6            |

**Abbreviation:** **WMD:** Weighted mean difference; **RR:** Risk ratio; **CI:** Confidence interval; **I<sup>2</sup>:** I-square; **N:** Number.

**Figure S1:** Risk of bias summary

|                | Randomization process | Deviations from intended interventions | Missing outcome data | Measurement of the outcome | Selection of the reported result | Overall bias |
|----------------|-----------------------|----------------------------------------|----------------------|----------------------------|----------------------------------|--------------|
| Earsakul 2017  | +                     | +                                      | +                    | +                          | +                                | +            |
| Ghoneim 2013   | ?                     | ●                                      | +                    | +                          | +                                | ●            |
| Hetta 2016     | +                     | +                                      | +                    | +                          | +                                | +            |
| Lamsal 2019    | +                     | +                                      | ?                    | +                          | +                                | ?            |
| Mahrar 2015    | +                     | +                                      | +                    | +                          | +                                | +            |
| Mansor 2015    | +                     | +                                      | +                    | +                          | +                                | +            |
| Mohamed 2016   | +                     | +                                      | +                    | +                          | +                                | +            |
| Patel 2016     | ?                     | ?                                      | +                    | +                          | +                                | ?            |
| Pushkarna 2022 | +                     | +                                      | +                    | +                          | +                                | +            |
| Salah 2018     | ?                     | +                                      | +                    | +                          | +                                | ?            |
| SK 2016        | +                     | +                                      | +                    | +                          | +                                | +            |
| Zhang 2012     | ?                     | ?                                      | +                    | +                          | +                                | ?            |
| Zhang 2016     | ?                     | ?                                      | +                    | +                          | +                                | ?            |
